# Supplementary material
Source: PubMed Central journal article supplement (PMC3876746)
Supplement: bm401312j_si_001.pdf [file bm401312j_si_001.pdf]

## Supporting information

### Achieving micelle control through core crystallinity

Lidija Glavas, Peter Olsén, Karin Odelius, Ann-Christine Albertsson

Fiber and Polymer Technology, School of Chemical Science and Engineering, KTH,

Royal Institute of Technology, SE-100 44 Stockholm, Sweden

#### CHARACTERIZATION OF COPOLYMERS

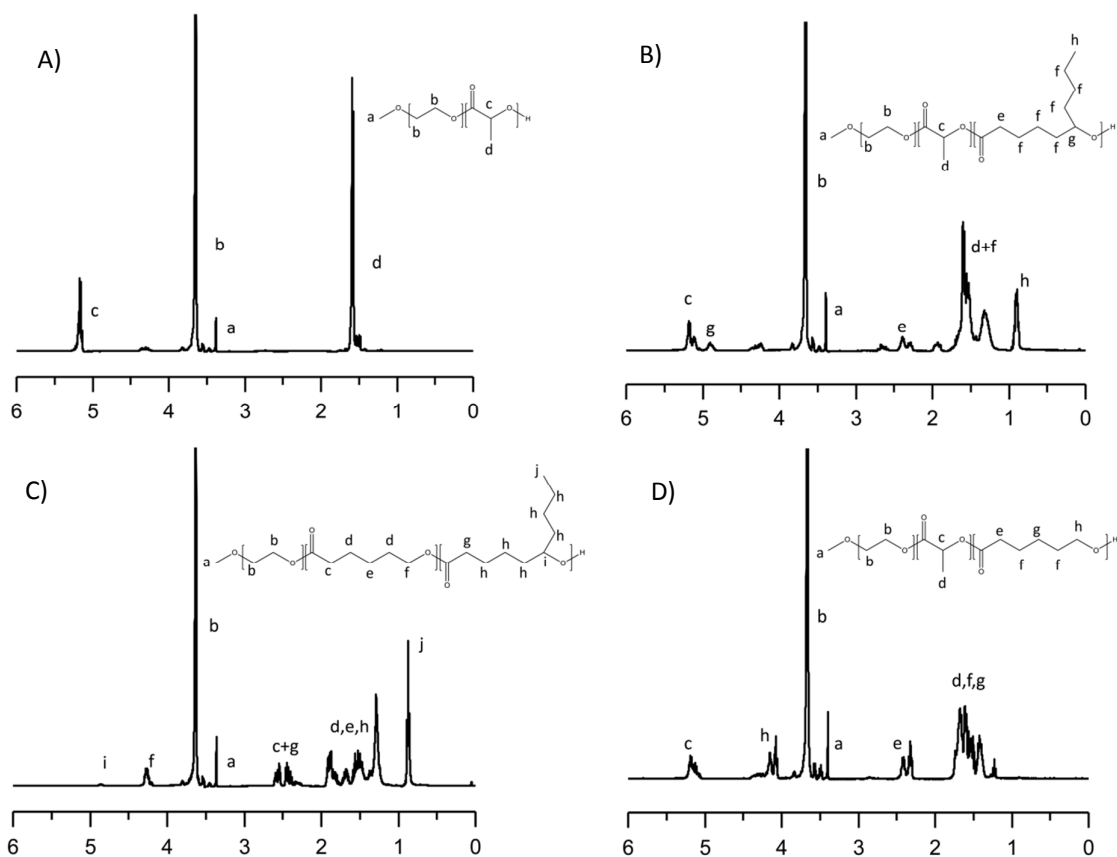

**Figure 1.** Determination of the chemical structure of A) PEG<sub>2k</sub>-PLA<sub>2k</sub>, B) PEG<sub>2k</sub>-P(LA/ $\epsilon$ DL)<sub>2k</sub>, C) PEG<sub>2k</sub>-P(CL/ $\epsilon$ DL)<sub>2k</sub> and D) PEG<sub>2k</sub>-P(CL/LA)<sub>2k</sub>. The molecular weights were calculated using  $^1\text{H-NMR}$  by integrating the methoxy peak of mPEG at 3.37 ppm and the peak for the repeating units of CL (at 4.06 ppm),  $\epsilon$ -DL (at 0.86 ppm), and LA (at 5.17 ppm).

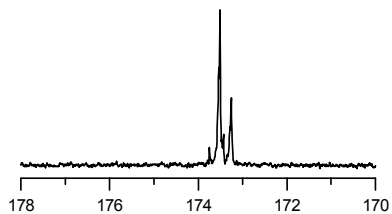

**Figure 2.**  $^{13}\text{C}$ -NMR of  $\text{PEG}_{2k}\text{-P}(\text{CL}/\epsilon\text{DL})_{2k}$  in the carbonyl region.

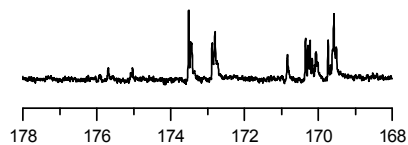

**Figure 3.**  $^{13}\text{C}$ -NMR of  $\text{PEG}_{2k}\text{-P}(\text{LA}/\epsilon\text{DL})_{2k}$  in the carbonyl region.

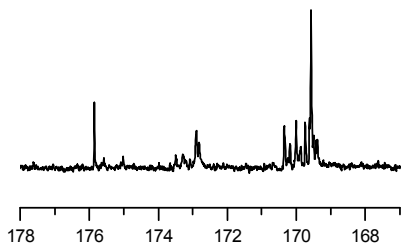

**Figure 4.**  $^{13}\text{C}$ -NMR of  $\text{PEG}_{2k}\text{-P}(\text{CL}/\text{LA})_{2k}$  in the carbonyl region.

**Table 1. The mass ratio of the hydrophobic block of the copolymers with two monomers in the hydrophobic block.**  
The ratios were calculated using values obtained from  $^1\text{H}$ -NMR.

| <b>Sample name</b>                             | <b>Mass ratio of the hydrophobic block [<math>M_1:M_2</math>]</b> |
|------------------------------------------------|-------------------------------------------------------------------|
| <i>PEG<sub>2k</sub>-P(CL/εDL)<sub>2k</sub></i> | 40:60                                                             |
| <i>PEG<sub>2k</sub>-P(LA/εDL)<sub>2k</sub></i> | 46:54                                                             |
| <i>PEG<sub>2k</sub>-P(CL/LA)<sub>2k</sub></i>  | 44:56                                                             |

**Table 2. The melting enthalpies of the all the copolymers.**

| <b>Sample name</b>                             | <b>Melting enthalpy [J/g]</b> |
|------------------------------------------------|-------------------------------|
| <i>PEG<sub>2k</sub>-PCL<sub>1k</sub></i>       | 141 <sup>a</sup>              |
| <i>PEG<sub>2k</sub>-PCL<sub>2k</sub></i>       | 121 <sup>a</sup>              |
| <i>PEG<sub>2k</sub>-PCL<sub>3k</sub></i>       | 97 <sup>a</sup>               |
| <i>PEG<sub>2k</sub>-PCL<sub>4k</sub></i>       | 89 <sup>a</sup>               |
| <i>PEG<sub>2k</sub>-PεDL<sub>1k</sub></i>      | 107                           |
| <i>PEG<sub>2k</sub>-PεDL<sub>2k</sub></i>      | 85                            |
| <i>PEG<sub>2k</sub>-PεDL<sub>3k</sub></i>      | 71                            |
| <i>PEG<sub>2k</sub>-PεDL<sub>4k</sub></i>      | 55                            |
| <i>PEG<sub>2k</sub>-PLA<sub>2k</sub></i>       | 83 <sup>a</sup>               |
| <i>PEG<sub>2k</sub>-P(CL/εDL)<sub>2k</sub></i> | 85                            |
| <i>PEG<sub>2k</sub>-P(LA/εDL)<sub>2k</sub></i> | 79                            |
| <i>PEG<sub>2k</sub>-P(CL/LA)<sub>2k</sub></i>  | 87                            |

<sup>a</sup> The melting enthalpies reported are combined enthalpies for both the PEG and the PCL/PLA-block.

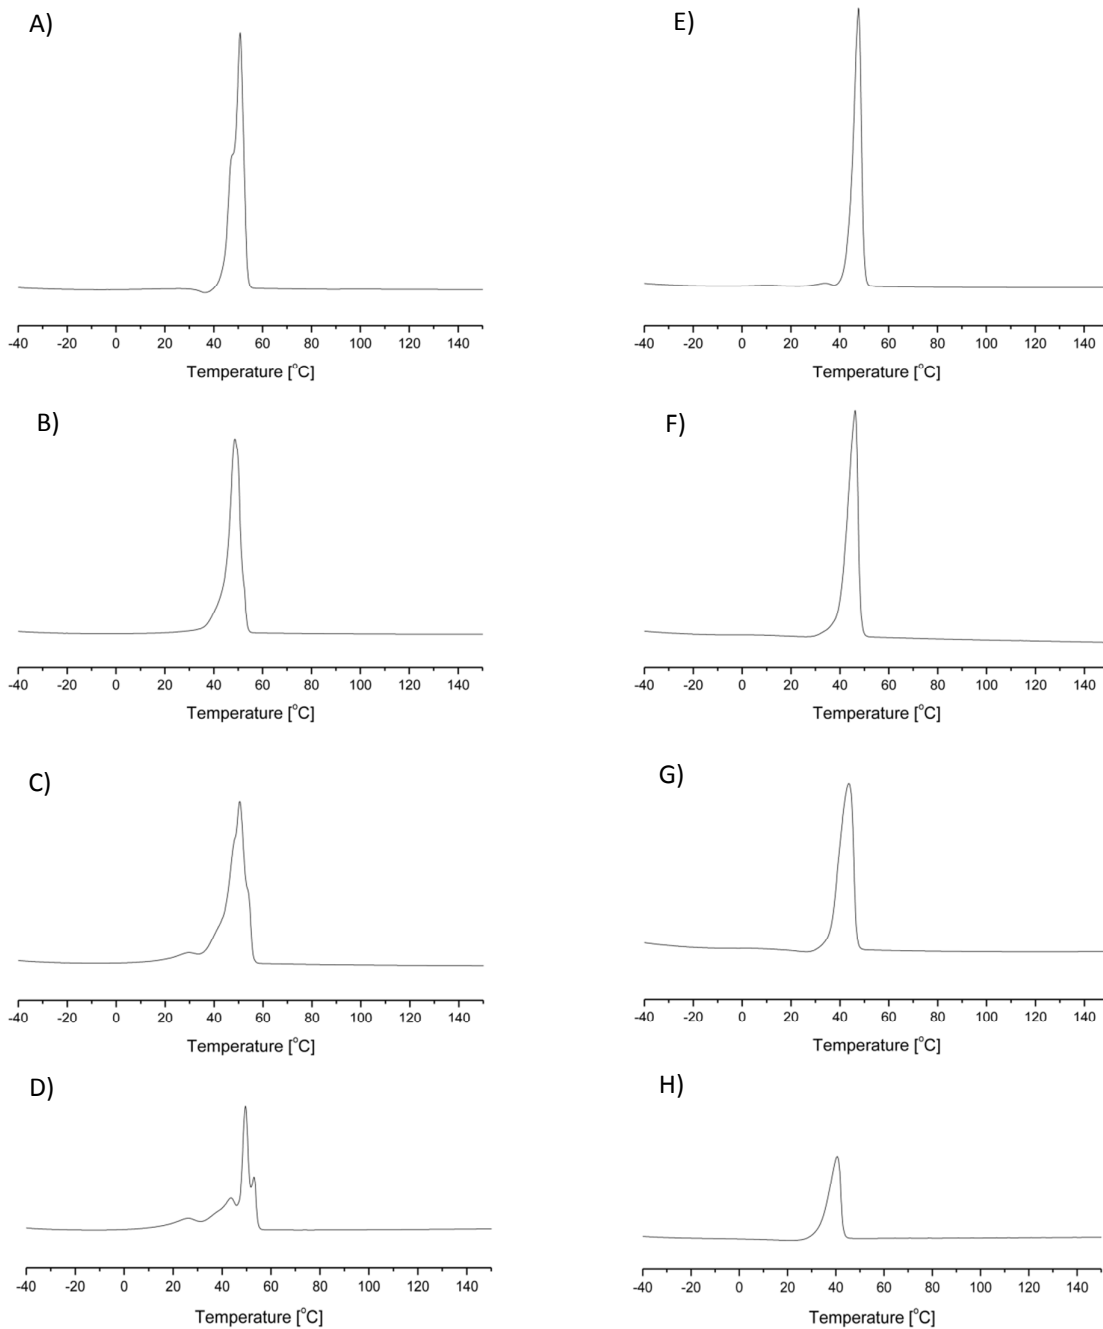

**Figure 5.** The DSC traces of A) PEG<sub>2k</sub>-PCL<sub>1k</sub>, B) PEG<sub>2k</sub>-PCL<sub>2k</sub>, C) PEG<sub>2k</sub>-PCL<sub>3k</sub>, D) PEG<sub>2k</sub>-PCL<sub>4k</sub>, E) PEG<sub>2k</sub>-PεDL<sub>1k</sub>, F) PEG<sub>2k</sub>-PεDL<sub>2k</sub>, G) PEG<sub>2k</sub>-PεDL<sub>3k</sub> and H) PEG<sub>2k</sub>-PεDL<sub>4k</sub>.

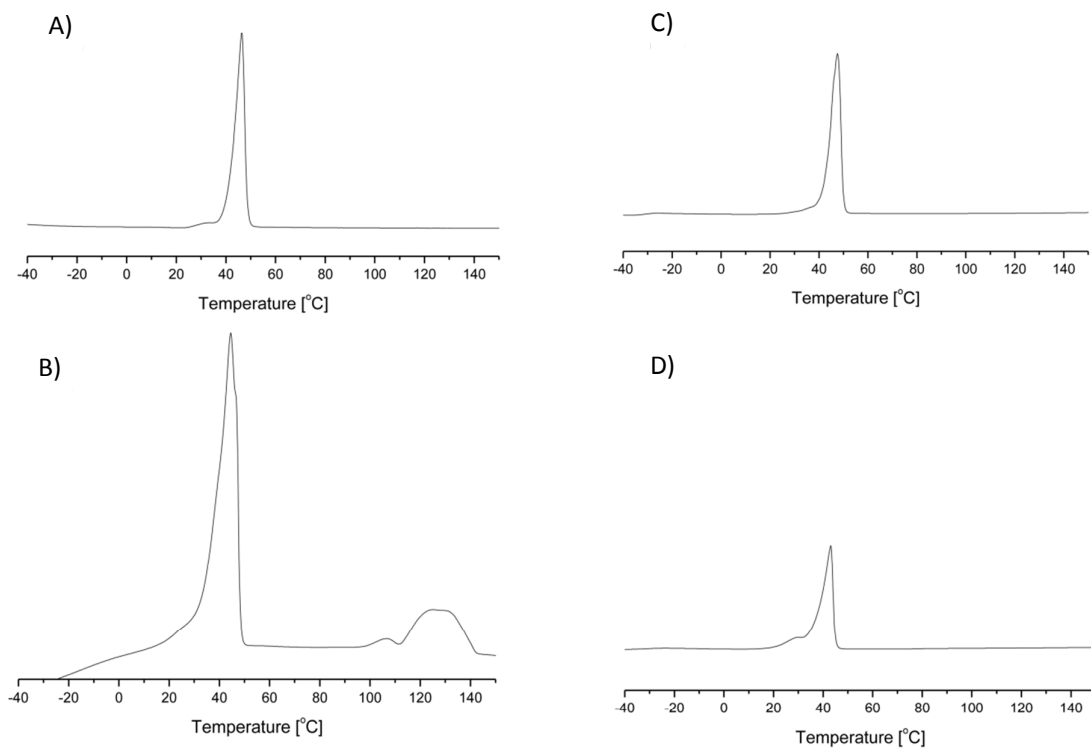

**Figure 6.** The DSC traces of A) PEG<sub>2k</sub>-P(CL/εDL)<sub>2k</sub>, B) PEG<sub>2k</sub>-PLA<sub>2k</sub>, C) PEG<sub>2k</sub>-P(LA/CL)<sub>2k</sub>, D) PEG<sub>2k</sub>-P(LA/εDL)<sub>2k</sub>.

## SELF-ASSEMBLY

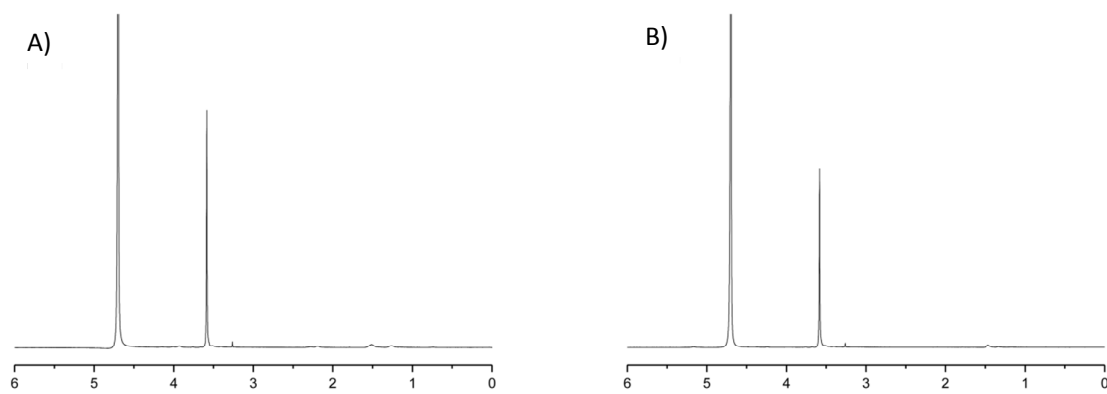

**Figure 7.** Evidence of the self-assembly of A) PEG<sub>2k</sub>-PCL<sub>2k</sub> and B) PEG<sub>2k</sub>-PLA<sub>2k</sub>. <sup>1</sup>H-NMR in D<sub>2</sub>O.

## MORPHOLOGY

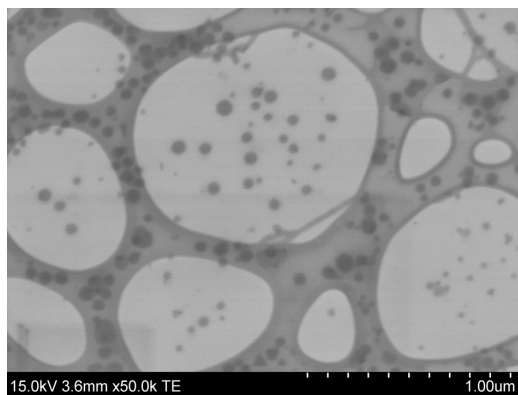

**Figure 8.** Morphology of PEG<sub>2k</sub>-PεDL<sub>2k</sub> at 0.6 mg/mL.

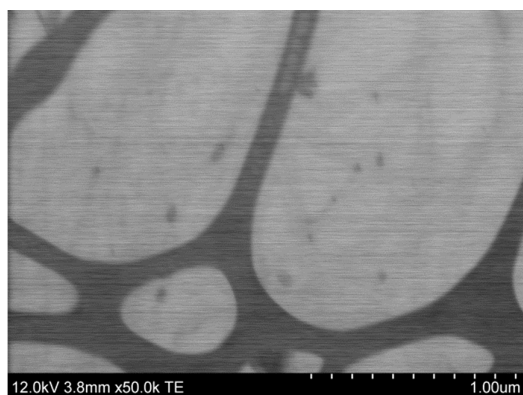

**Figure 9.** Morphology of PEG<sub>2k</sub>-PCL<sub>2k</sub> at 0.6 mg/mL.

## MICELLE STABILITY

**Table 3.** The stability of the micelles (0.6 mg/mL) after 4 weeks measured by DLS.

| Sample name                                    | Size <sup>a</sup> [nm] | Size <sup>b</sup> [nm] |
|------------------------------------------------|------------------------|------------------------|
| <i>PEG<sub>2k</sub>-PCL<sub>2k</sub></i>       | 29                     | 42                     |
| <i>PEG<sub>2k</sub>-PLA<sub>2k</sub></i>       | 57                     | 62                     |
| <i>PEG<sub>2k</sub>-PεDL<sub>2k</sub></i>      | 27                     | 27                     |
| <i>PEG<sub>2k</sub>-P(CL/εDL)<sub>2k</sub></i> | 41                     | 46                     |
| <i>PEG<sub>2k</sub>-P(LA/εDL)<sub>2k</sub></i> | 24                     | 38                     |
| <i>PEG<sub>2k</sub>-P(LA/CL)<sub>2k</sub></i>  | 27                     | 26                     |

<sup>a</sup> Z-average value

<sup>b</sup> Z-average value after 4 weeks
